# Supplementary material for: Smoking behaviour among adult patients presenting to health facilities in four provinces of Vietnam
Source: Springer Nature journal article supplement (doi:10.1186/s12889-021-10880-z), 2021-05-01
Supplement: MOESM1 [file 19124320]

Supplementary Table S1. Demographics of current smokers completing full baseline survey, by level of healthcare facility

|                                             | All facilities<br>(46 facilities)<br>n = 748 | Central/provincial hospital<br>(8 facilities)<br>n = 277 | District hospital<br>(16 facilities)<br>n = 408 | Commune health centre<br>(12 facilities)<br>n = 63 |
|---------------------------------------------|----------------------------------------------|----------------------------------------------------------|-------------------------------------------------|----------------------------------------------------|
| Age, years (median, IQR)                    | 57 (46 - 65)                                 | 56 (42 - 64)                                             | 58 (48 - 65)                                    | 57 (48 - 65)                                       |
| Male gender (n, %)                          | 743 (99.3%)                                  | 276 (99.6%)                                              | 406 (99.5%)                                     | 61 (96.8%)                                         |
| <b>Education level (n, %)</b>               |                                              |                                                          |                                                 |                                                    |
| Less than primary                           | 51 (6.8%)                                    | 18 (6.5%)                                                | 30 (7.4%)                                       | 3 (4.8%)                                           |
| Primary                                     | 219 (29.3%)                                  | 89 (32.1%)                                               | 110 (27.0%)                                     | 20 (31.8%)                                         |
| Lower secondary                             | 283 (37.8%)                                  | 95 (34.3%)                                               | 161 (39.5%)                                     | 27 (42.9%)                                         |
| Upper secondary                             | 141 (18.9%)                                  | 49 (17.7%)                                               | 82 (20.1%)                                      | 10 (15.9%)                                         |
| University degree, or equivalent, or higher | 51 (6.8%)                                    | 24 (8.7%)                                                | 24 (5.9%)                                       | 3 (4.8%)                                           |
| Unknown/No answer                           | 3 (0.4%)                                     | 2 (0.7%)                                                 | 1 (0.2%)                                        | 0 (0.0%)                                           |
| <b>Occupation (n, %)</b>                    |                                              |                                                          |                                                 |                                                    |
| Indoor manual labourer                      | 65 (8.7%)                                    | 24 (8.7%)                                                | 39 (9.6%)                                       | 2 (3.2%)                                           |
| Outdoor manual labourer                     | 68 (9.1%)                                    | 19 (6.9%)                                                | 45 (11.1%)                                      | 4 (6.3%)                                           |
| Agricultural work                           | 188 (25.1%)                                  | 69 (24.9%)                                               | 93 (22.9%)                                      | 26 (41.3%)                                         |
| Retired                                     | 203 (27.1%)                                  | 72 (26.0%)                                               | 118 (29.0%)                                     | 12 (19.0%)                                         |
| Unemployed                                  | 18 (2.4%)                                    | 5 (1.8%)                                                 | 7 (1.7%)                                        | 6 (9.5%)                                           |
| Other                                       | 206 (27.5%)                                  | 88 (31.8%)                                               | 105 (25.8%)                                     | 13 (20.6%)                                         |
| <b>Comorbidity (n, %)</b>                   |                                              |                                                          |                                                 |                                                    |
| Heart disease                               | 73 (9.8%)                                    | 25 (9.0%)                                                | 44 (10.8%)                                      | 4 (6.3%)                                           |
| Hypertension                                | 205 (27.4%)                                  | 58 (20.9%)                                               | 133 (32.6%)                                     | 14 (22.2%)                                         |
| Diabetes                                    | 88 (11.8%)                                   | 21 (7.6%)                                                | 64 (15.7%)                                      | 3 (4.8%)                                           |
| Asthma                                      | 45 (6.0%)                                    | 18 (6.5%)                                                | 19 (4.7%)                                       | 8 (12.7%)                                          |
| COPD                                        | 30 (4.0%)                                    | 15 (5.4%)                                                | 14 (3.4%)                                       | 1 (1.6%)                                           |
| Chronic bronchitis                          | 67 (9.0%)                                    | 32 (11.6%)                                               | 25 (6.1%)                                       | 10 (15.9%)                                         |
| Emphysema*                                  | 3 (0.5%)                                     | 1 (0.4%)                                                 | 2 (0.5%)                                        | 0 (0.0%)                                           |
| History of tuberculosis                     | 65 (8.7%)                                    | 38 (13.7%)                                               | 20 (4.9%)                                       | 7 (11.1%)                                          |
| <b>Geographic area (n, %)</b>               |                                              |                                                          |                                                 |                                                    |
| Northern Vietnam                            | 389 (52.0%)                                  | 150 (54.2%)                                              | 205 (50.2%)                                     | 34 (54.0%)                                         |

|                                                                                                                           |             |             |             |            |
|---------------------------------------------------------------------------------------------------------------------------|-------------|-------------|-------------|------------|
| <b>Hanoi</b>                                                                                                              | 169 (22.6%) | 66 (23.8%)  | 103 (25.2%) | 0 (0.0%)   |
| <b>Thanh Hoa</b>                                                                                                          | 220 (29.4%) | 84 (30.3%)  | 102 (25.0%) | 34 (54.0%) |
| <b>Southern Vietnam</b>                                                                                                   | 359 (48.0%) | 127 (45.8%) | 203 (49.8%) | 29 (46.0%) |
| <b>Ho Chi Minh City</b>                                                                                                   | 143 (19.1%) | 36 (13.0%)  | 102 (25.0%) | 5 (7.9%)   |
| <b>Ca Mau</b>                                                                                                             | 216 (28.9%) | 91 (32.9%)  | 101 (24.8%) | 24 (38.1%) |
| <b>Had breathing problems that interfered with usual daily activities<sup>†</sup> (n, %)</b>                              | 52 (7.7%)   | 18 (7.6%)   | 31 (8.0%)   | 3 (5.3%)   |
| <b>Living with at least one other who smoked a cigarette, pipe or cigar in your home during the past two weeks (n, %)</b> | 241 (32.2%) | 92 (33.2%)  | 131 (32.1%) | 18 (28.6%) |

IQR: interquartile range; \*83 missing values; <sup>†</sup>69 missing

**Supplementary Table S2: Comparison between current smokers who were included and those who were not included at all healthcare facilities**

|                          | Eligible, not selected | Eligible, selected |
|--------------------------|------------------------|--------------------|
| Total                    | 390                    | 1044               |
| Male (n, %)              | 367 (94.1%)            | 1,027 (98.4%)      |
| Age, years<br>(mean, SD) | 52.7 (15.4)            | 53.9 (14.5)        |

**Supplementary Table S3: Comparison between current smokers who completed the full survey, those who completed the minimal data questionnaire, and those who refused to participate at all healthcare facilities**

|                          | Full<br>baseline<br>survey | Minimal<br>data | Refused to<br>participate |
|--------------------------|----------------------------|-----------------|---------------------------|
| Total                    | 748                        | 51              | 245                       |
| Male (n, %)              | 741 (99.1)                 | 50 (98.0)       | 236 (96.3)                |
| Age, years<br>(mean, SD) | 54.7 (14.4)                | 51.4 (13.2)     | 51.7 (14.7)               |

**Supplementary Table S4: Use of tobacco products among current smokers who completed the full survey**

|                                        | Current smokers<br>n = 748 |
|----------------------------------------|----------------------------|
| Manufactured cigarettes (n, %)         | 550 (73.5%)                |
| Hand-rolled cigarettes (n, %)          | 56 (7.5%)                  |
| Kreteks (n, %)                         | 0 (0%)                     |
| Pipes full of tobacco (n, %)           | 0 (0%)                     |
| Cigars, cheroots, or cigarillos (n, %) | 4 (0.5%)                   |
| Water pipes (n, %)                     | 242 (32.4%)                |
| Electronic cigarettes (n, %)           | 0 (0%)                     |
